# Supplementary material
Source: PubMed Central journal article supplement (PMC3837958)
Supplement: JB.00780-13_zjb999092910so1.pdf [file JB.00780-13_zjb999092910so1.pdf]

**Fig. S1**

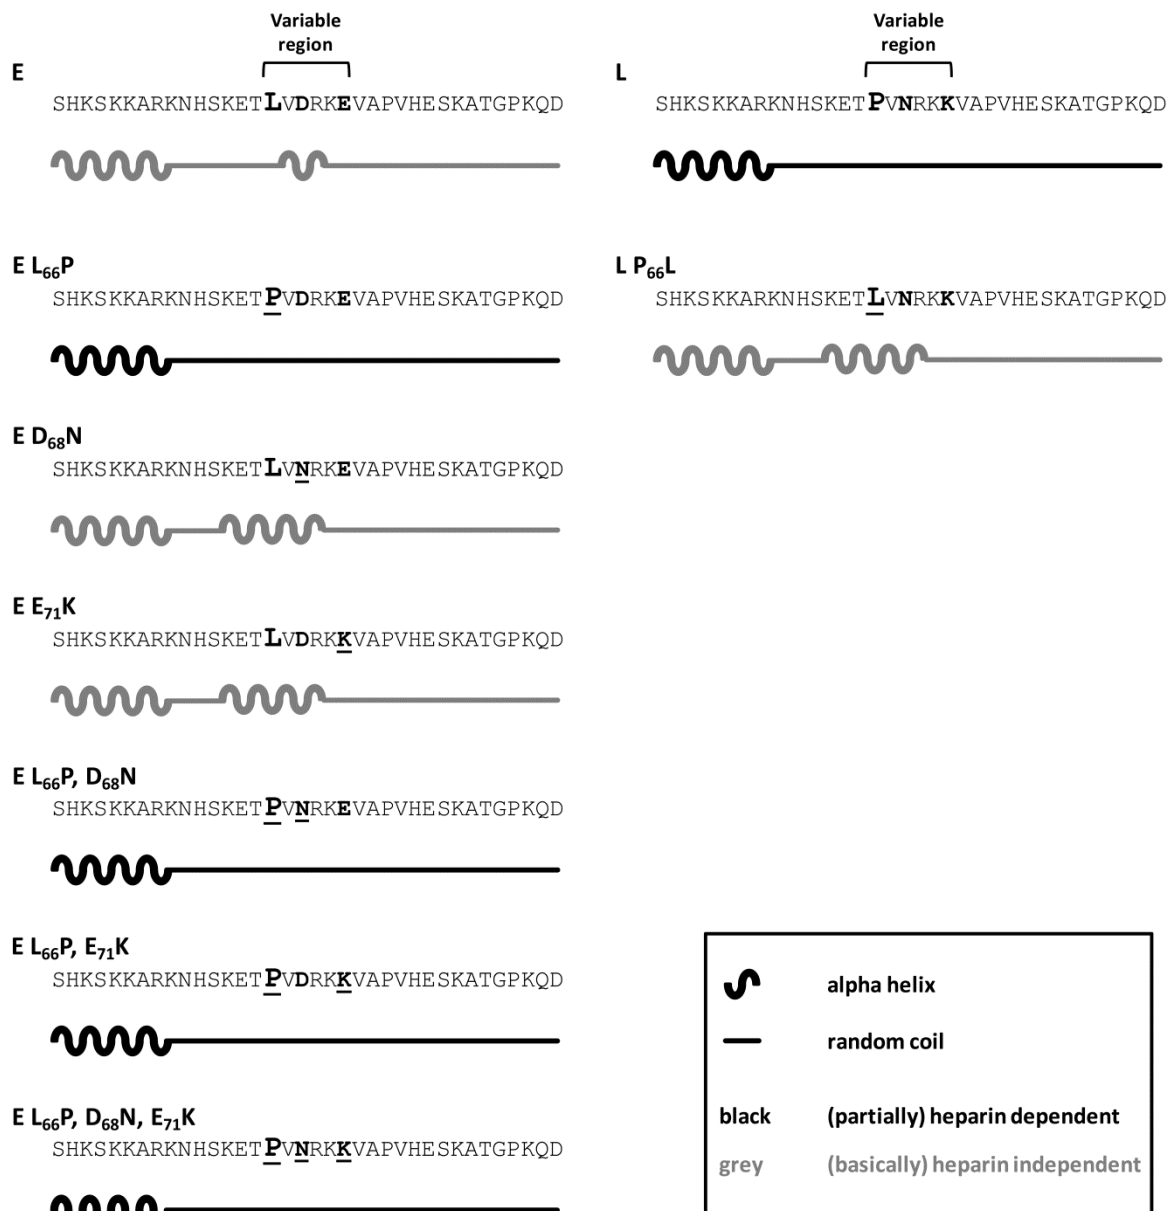

**Fig. S1: Schematic illustration of the different *C. trachomatis* LGV serovars and serovar E OmcB variants (aa 51 - 86) with predicted secondary structures.**

The variable amino acids (position 66, 68 and 71) within the variable domain are shown in bold, the substituted amino acids are underlined. The crucial amino acid for the determination of heparin-dependence or independence of adhesion (L/P position 66) is enlarged.
